1                   **Molecular mode of action of an Acyl Protein thioesterase**

2

3           Laurence Abrami<sup>1,5</sup>, Martina Audagnotto<sup>2,5</sup>, Sylvia Ho<sup>1</sup>, Maria Jose Marcaida<sup>2</sup>,  
4           Francisco S. Mesquita<sup>1</sup>, Muhammad U. Anwar<sup>1</sup>, Patrick A. Sandoz<sup>1</sup>, Giulia Fonti<sup>2</sup>,  
5           Florence Pojer<sup>3</sup>, Matteo Dal Peraro<sup>2,4\*</sup> and F. Gisou van der Goot<sup>1\*</sup>

6

7           <sup>1</sup>Global Health Institute, <sup>2</sup>Institute of Bioengineering, and <sup>3</sup>Protein Production and  
8           Structure Core Facility, School of Life Sciences, EPFL, <sup>4</sup>Swiss Institute of  
9           Bioinformatics, Lausanne, Switzerland

10

11   \*Corresponding Authors: F. Gisou van der Goot ([gisou.vandergoot@epfl.ch](mailto:gisou.vandergoot@epfl.ch)) and  
12   Matteo Dal Peraro ([matteo.dalperaro@epfl.ch](mailto:matteo.dalperaro@epfl.ch))

13   <sup>5</sup>These authors contributed equally

14

15

16 **ABSTRACT**

17 Many biochemical reactions occur at the membrane interfaces. The proper control of  
18 these reactions requires spatially and temporally controlled recruitment of protein  
19 complexes. These assemblies are largely regulated by post-translational modifications  
20 and a frequent one is S-acylation, which consists of the addition of medium length acyl  
21 chains. Reversibility of this modification is ensured by acyl protein thioesterases  
22 (APTs), which are poorly understood enzymes. Using a combination of computational,  
23 structural, biochemical, and cellular approaches, we dissect the mode of action of a  
24 major cellular thioesterase, APT2 (LYPLA2). We show that for APT2 to encounter its  
25 targets, it must interact with membranes by two consecutive steps, the insertion of a  
26 hydrophobic loop and subsequent S-acylation by the ZDHHC3 or ZDHHC7  
27 palmitoyltransferases. Once bound, APT2 deforms the lipid bilayer to extract the acyl  
28 chain bound to its substrate, capturing it in a hydrophobic pocket and allowing  
29 hydrolysis. Deacylation releases APT2, allowing it to bind to other membranes, but  
30 also renders it vulnerable to ubiquitination and proteasomal degradation. This  
31 molecular understanding of APT2 paves the way to understand the dynamics of APT2-  
32 mediated depalmitoylation throughout the endomembrane system.

33

## 34 INTRODUCTION

35 Eukaryotic cells are complex factories, with millions of separate reactions  
36 occurring simultaneously to control every aspect of how that cell functions and  
37 behaves with respect to other cells. This requires the exquisite spatial and temporal  
38 control of proteins, often through post-translational modifications. One of the most  
39 frequent modifications, affecting 10 to 20% of the human proteome, is the S-acylation  
40 (Khoury *et al*, 2011; Blanc *et al*, 2019), which can modify a plethora of signaling  
41 molecules, such as the EGF receptor or Ras, adhesion molecules, and many  
42 transporters. S-acylation is also a key modification in the life cycle of viruses (Gadalla  
43 & Veit, 2020) and parasites (Brown *et al*, 2017). This lipidation may affect the  
44 trafficking, function, or turnover rate of proteins, and therefore its reversibility is an  
45 essential part of its regulatory capacity (Zaballa & van der Goot, 2018). Little is known,  
46 however, about acyl protein thioesterases (APTs), the proteins responsible for  
47 removing the acyl chains. Therefore, we herein focused on understanding the mode  
48 of action of APT2, a major cytosolic thioesterase, that is involved in the palmitoylation  
49 cycle of a variety of proteins, such as the TNF receptor (Zingler *et al*, 2019), the  
50 melanocortin 1 receptor (Chen *et al*, 2019), and the palmitoyltransferase ZDHHC6  
51 (Abrami *et al*, 2017).

52 Similar to other lipid modifications, S-acylation modifies the lipophilicity of  
53 proteins, thereby affecting their ability to interact with membranes or membrane  
54 domains. S-acylation is unique amongst lipid modifications in its reversibility (Conibear  
55 & Davis, 2010; Fukata *et al*, 2016; Lemonidis *et al*, 2015; Salaun *et al*, 2010). During  
56 enzymatic S-acylation, medium chain fatty acids are added to cysteine residues  
57 through the action of acyltransferases of the ZDHHC family, which are transmembrane  
58 proteins with an active site on the cytosolic side of the membrane. Regulatory removal

59 of the fatty acid is mediated by cytosolic APTs (Lin & Conibear, 2015; Won *et al*, 2018),  
60 wherein all identified members belong to the  $\alpha/\beta$  hydrolase super family. APT2 is a  
61 soluble globular enzyme that can undergo S-acylation at its N-terminus on Cys2 (Kong  
62 *et al*, 2013; Vartak *et al*, 2014). This is thought to bring APT2 to the membranes that  
63 contain its substrates for encounter with and subsequent deacylation of that substrate.  
64 Even though the structure of an inhibitor-bound form of APT2 has been solved (Won  
65 *et al*, 2016), how APT2 interacts with the membrane and how it catalyzes the release  
66 of the bound fatty acid is not known. Because it has been shown that single acylation  
67 of a protein is insufficient to allow stable association with membranes (Shahinian &  
68 Silvius, 1995), we anticipate that APT2 must have an additional mode of membrane  
69 interaction, which could be dimerization, a second lipid modification, or a lipid-binding  
70 motif within the protein.

71 To investigate how APT2 binds to membranes and brings about the deacylation  
72 of its targets, we first choose a structural approach combining X-ray crystallography  
73 and molecular dynamics (MD) simulations. Using this, we identified a loop, coined the  
74  $\beta$  tongue, which mediates membrane interaction both *in vitro* and *in vivo* in a step that  
75 precedes and is necessary for S-acylation of APT2 to occur. We identified the ZDHHC  
76 palmitoyl transferases involved and show that the sequential membrane association  
77 process controls both the turnover rate of APT2 and its activity. Next, we identified a  
78 hydrophobic pocket within APT2 that captures the acyl chain prior to hydrolysis.  
79 Molecular dynamics simulations further indicate that APT2 can deform the lipid leaflet  
80 to which it binds, to extract the substrate-bound acyl chain from the membrane,  
81 position it in a hydrophobic pocket allowing the thioester bond to be cleaved in the  
82 catalytic site. Finally, we show that cells tightly control the concentration of soluble  
83 APT2, through a mechanism built within the  $\beta$  tongue, where a sensitive ubiquitination

84 site is protected in the membrane bound state. Altogether, these results on APT2  
85 provide detailed and previously unknown information about how this thioesterase  
86 mediates de-acylation and is regulated in the cell, helping broaden our picture of how  
87 S-acylation cycles control cellular processes.

88

## 89 **RESULTS**

### 90 **APTs are monomers in solution**

91 Our first goal was to perform a crystallization study on full length APTs, as opposed to  
92 previous N-terminal truncated versions (Devedjiev *et al*, 2000) and to compare WT  
93 and mutants. APT1 and APT2 are 68% identical and were found to have essentially  
94 the same structure (Wepy *et al*, 2019; Won *et al*, 2016). As previously reported (Won  
95 *et al*, 2016), however, APT1 is more stable, and was more amenable to crystallization.  
96 Therefore, we performed our crystallization studies on APT1. We produced full-length,  
97 human, wildtype (WT) APT1, as well as palmitoylation deficient (C2S) and catalytically  
98 inactive (APT1-S119A and APT2-S122A) mutants in *E. coli*. All variants could be  
99 successfully crystalized (**Supplementary Table 1**). APT1 has a near-canonical  $\alpha/\beta$   
100 hydrolase fold characterized by the presence of the typical catalytic triad (i.e., Ser119,  
101 Asp174, and His208, **Fig. 1ab**) and a central  $\beta$ -sheet (labeled  $\beta 2$  to  $\beta 8$  in **Fig. 1ab**),  
102 which is connected to five  $\alpha$ -helices (labeled A to F) and four smaller  $\alpha$ -helices (labeled  
103 G1 to G4) (Devedjiev *et al*, 2000). Importantly, when compared to the canonical  $\alpha/\beta$   
104 hydrolase fold, both APT1 and APT2 have an atypical insertion of four short  
105 antiparallel  $\beta$  strands (labeled S1-S4, **Fig. 1b**) organized into loop-like structures that,  
106 as described below, are critical to their protein acylthioesterase function.

107 The APT1 variants crystallized into different forms, with space group  $P4_12_12$  for  
108 WT,  $P2_12_12$  for the C2S mutant, and  $P6_4$  for the S119A mutant (**Supplementary Table**

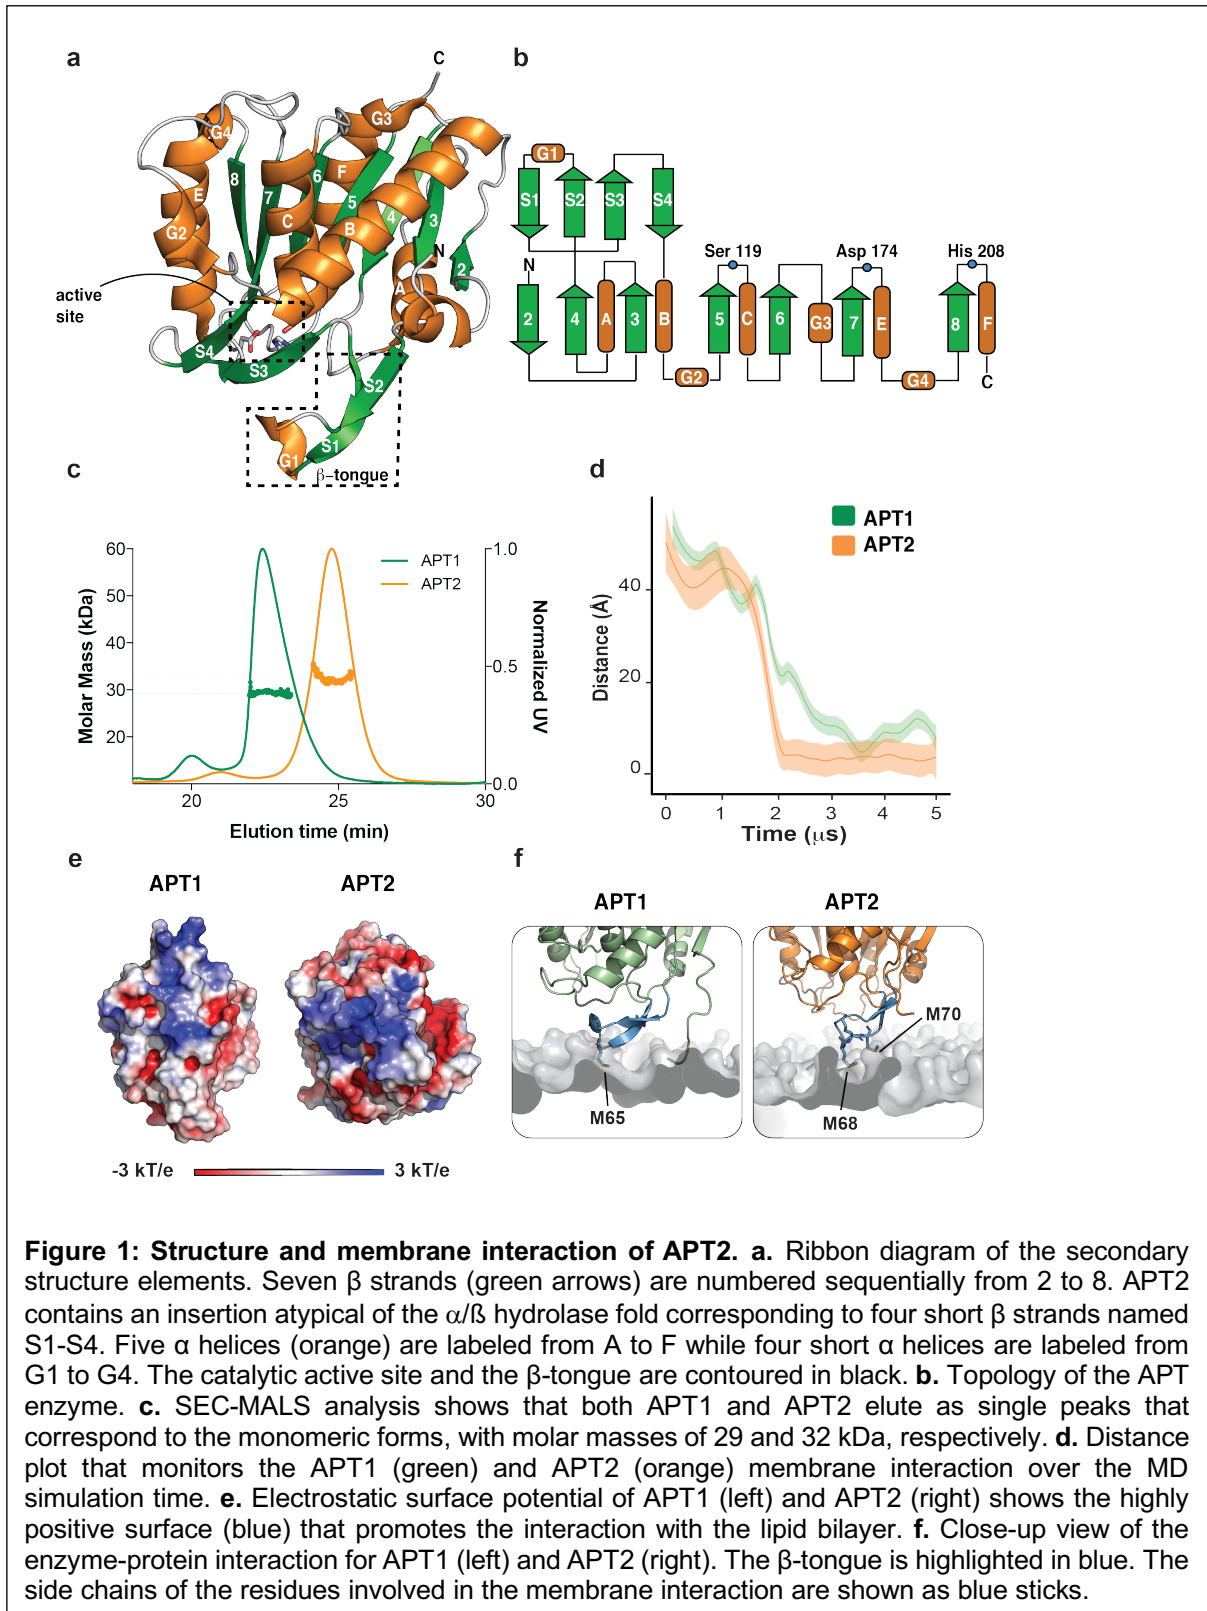

109 1). The average RMSD for the 230 common  $C_{\alpha}$  atoms between our structures and the  
 110 first published APT1 structure (PDB id: 1FJ2, Devedjiev *et al*, 2000) was  $\sim 1.2$  Å. The  
 111 asymmetric units of the crystals contained 2 or 6 monomers (**Supplementary Table**

112 1). For each structure, EPPIC (Duarte *et al*, 2012) predicted the possible existence of  
113 dimers, as was previously reported. Our WT and C2S X-ray structures showed a  
114 similar intermolecular interface (RMSD ~1.1 Å). In contrast, the previously solved  
115 APT1 structure (PDB id: 1FJ2, Devedjiev *et al*, 2000) and the catalytically inactive  
116 APT1 mutant (S119A) had a largely different conformation (RMSD ~14.2 Å)  
117 (**Supplementary Fig.1**). Principal component analysis based on atomistic MD  
118 simulations of the WT APT1 structure highlighted a large rotational motion centered at  
119 the supposed dimeric interface (**Supplementary Fig.1**). Crystallographic evidence  
120 and MD simulations thus indicate that the dimeric arrangement of APT1 is intrinsically  
121 flexible. Interestingly, these dimerizing interfaces also included the APT1 catalytic  
122 pocket such that it was partially occluded by the adjacent protomer. Similar  
123 observations were made regarding APT2. Backbone RMSD calculations on  
124 superimposed APT2 structures (PDB: 6BJE and 5SYN; RMSD 14Å, **Supplementary**  
125 **Fig.1cd**) combined with structural comparison and principal component analysis  
126 indicate a flexible dimer interface. These observations indicate that both APT1 and  
127 APT2 have dimeric conformations that are probably transient, suggestive of a  
128 monomeric active form of the enzyme.

129 To directly address the stoichiometry of APTs in solution, we measured  
130 molecular weights using size-exclusion chromatography (SEC) coupled to multi-angle  
131 light scattering (MALS). The molecular mass determined by SEC-MALS was 29 kDa  
132 for APT1 and 32 kDa for APT2 (**Fig. 1c**), close to the theoretical molecular weights of  
133 monomers (25 and 27 kDa, respectively), indicating that the enzymes are monomeric  
134 in solution at physiological concentrations. These observations reconcile the finding of  
135 a flexible, heterogeneous dimer interface in APT1 and APT2 under crystallization  
136 conditions and suggest that the APTs act as monomeric entities in solution and most

137 likely also when interacting with membrane surfaces, as the catalytic site would be  
138 otherwise occluded.

139

#### 140 **APTs are predicted to have intrinsic membrane binding affinity**

141 The target proteins of APTs are S-acylated proteins, so to reach their  
142 membrane-associated substrates, APTs must be near membranes. We explored  
143 whether APTs can interact with membranes directly using coarse-grained MD (CG-  
144 MD) simulations in the presence of a palmitoyl-oleoyl-phosphatidylcholine (POPC)  
145 bilayer model. The simulations showed that APT1 and APT2 invariably interact with  
146 the membrane bilayer (**Fig. 1d**) and always via the same surface (**Fig. 1ef**), which  
147 corresponds to the intermolecular interface observed in the APT X-ray structures  
148 (**Supplementary Fig.1**). Electrostatic calculations showed that the membrane-  
149 interacting surfaces of APT1 and APT2 contained highly positively charged regions  
150 that likely promote the initial association with the membrane by long-range  
151 electrostatic attraction (**Fig. 1e**). APT1 has two distinct positively charged regions  
152 (region A: Arg13, Lys14, His43 and Lys45; region B: His23, His30 and His50) (**Fig.**  
153 **1e**, left), while APT2 has a single larger area (Arg59, His55, His28, His170, His208)  
154 (**Fig. 1e**, right), allowing both proteins to regularly interact with the membrane on a  $\mu$ s  
155 timescale. Interestingly, once close to the membrane, APT1 and APT2 use the S1 and  
156 S2 strands and the G1 helix, which are mostly hydrophobic, to anchor the enzyme to  
157 the membrane (**Fig. 1f**). S1, S2 and G1 are part of the atypical insertion that APTs  
158 have when compared to classical  $\alpha/\beta$  hydrolases (**Fig. 1b**). By analogy to a similar  
159 membrane-anchoring loop in the pore-forming toxin cytolysin A (ClyA) (Mueller *et al*,  
160 2009), we coined the S1-G1-S2 loop the  $\beta$  tongue.

161



## 162 ***In vitro* APT membrane binding is mediated by the $\beta$ tongue**

163 To test the prediction that APTs have intrinsic membrane binding activity, we  
164 incubated purified APT1 and APT2 with liposomes composed of phosphatidylcholine:  
165 phosphatidylserine: phosphatidylethanolamine (PC:PS:PE 2:2:1). The mixtures were  
166 subsequently submitted to a sucrose flotation step gradient to separate vesicle-bound  
167 from unbound protein. While the proteins remained in the bottom fraction in the  
168 absence of liposomes, they were recovered at the top interface when liposomes were  
169 present (**Fig. 2a**), indicating an interaction with the membrane. Analysis of the APT-  
170 bound liposomes by electron microscopy confirmed the presence of a layer of proteins  
171 decorating the surface of the liposomes (**Fig. 2b**).

172 To analyze the importance of the  $\beta$  tongue in this interaction, we generated  
173 various mutants. We focused mostly on APT2 because, as opposed to APT1 that is  
174 most abundant in mitochondria (Kathayat *et al*, 2018), APT2 is found on the cytosolic  
175 side of membranes and is thus topologically able to revert the action of ZDHHC  
176 enzymes. We produced the M68Q, M68E, M70T, and M68E-M70T APT2 mutants as  
177 well as the M65E APT1 mutant. Secondary structure analysis of the APT2 mutants  
178 using circular dichroism (CD) in the far UV range indicated that the  $\beta$  tongue mutations  
179 did not significantly affect the APT2 secondary structure (**Fig. 2c**). We also performed  
180 unfolding studies measuring the change in ellipticity at 222 nm as a function of  
181 temperature. The melting temperature was similar for WT and mutant APT2s (**Fig.**  
182 **2d**), indicating that the stability of the proteins was preserved. Using a colorimetric  
183 assay, we verified that the *in vitro* deacylating activity of APT2 was not drastically  
184 affected by the mutations (**Fig. 2e**). Finally, we tested their liposome binding capacity.  
185 While the M68Q behaved like WT APT2, all other mutants failed to stably bind to  
186 liposomes (**Fig. 2f**). Similarly, the M65E APT1  $\beta$  tongue mutation impaired liposome

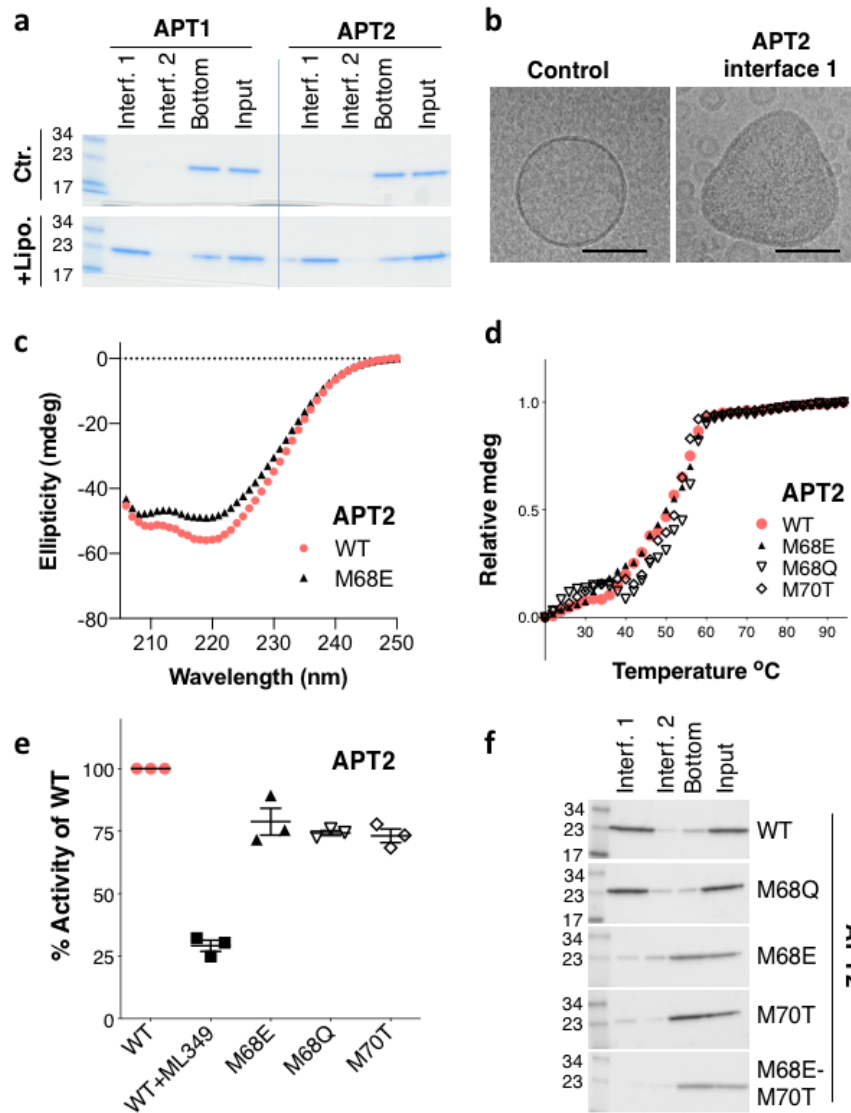

**Figure 2:  $\beta$ -tongue-mediated membrane binding of APTs.** **a.** Purified WT APT1 and WT APT2 protein were incubated with liposomes and applied to the bottom of a step sucrose gradient. The interfaces were collected from top to bottom, loaded on an SDS-PAGE gel, and stained with Coomassie blue. **b.** Interface 1 (Interf. 1) for WT–APT2-loaded liposomes was analyzed by negative staining and cryo EM. Bar = 100  $\mu$ m. **c.** Circular dichroism spectra of WT APT2 and the  $\beta$  tongue M68E mutant. **d.** Thermal denaturation profiles of WT APT2 or the  $\beta$  tongue mutants as monitored by circular dichroism at 222 nm. The normalized ellipticity at 222 nm is plotted against temperature. **e.** The thioesterase activity of WT APT2 or the  $\beta$  tongue mutants was determined at 60 min after the addition of substrate and detergent. APT2-specific inhibitor ML349 was included as a positive control. Technical replicates were averaged within each experiment, and then each experiment was normalized to WT. The average of each experiment was graphed. Two-tailed two-sample unequal variance t-tests were performed on the raw values normalized to the plate. **f.** WT and different APT2 mutants were incubated with liposomes and applied to the bottom of a sucrose gradient. The different interfaces from the top to bottom were collected and loaded on an SDS-PAGE and stained with Coomassie blue.

187 binding (**Supplementary Fig.1e**). Altogether, these experiments confirm the  
 188 predictions from the MD simulations that APTs have intrinsic membrane binding

189 affinity driven by the  $\beta$  tongue.

190

### 191 **Membrane-anchoring-deficient APT2 mutants are targeted to the proteasome**

192 We next analyzed the APT2  $\beta$  tongue mutants upon expression in cells. To our  
193 surprise, those that failed to bind liposomes were barely expressed upon transient  
194 transfection in HeLa cells (**Fig. 3a**, control). Expression could be rescued by the  
195 proteasome inhibitor MG132 (**Fig. 3b**, +MG132), suggesting that the mutants were  
196 synthesized by the cell but rapidly degraded. To confirm this, we performed <sup>35</sup>S-  
197 Cys/Met metabolic pulse-chase experiments. While the apparent half-life of WT APT2  
198 after a 20 min pulse was approximately 5 h, it dropped to <2 h for the M68E and M70T  
199 mutants (**Fig. 3b**).

200 To test the membrane binding capacity of the mutants, we expressed APT2  
201 variants and treated cells with MG132 for 4 h, before submitting post-nuclear  
202 supernatants (PNS) to high speed centrifugation. Analysis of the pellets and the  
203 supernatants showed that while the WT protein was mostly found in the pellet, the  
204 M68E and M70T mutants were exclusively found in the supernatant (**Fig. 3c**). These  
205 observations were confirmed by immunofluorescence analysis, which showed a  
206 cytosolic-like staining of the mutants (**Fig. 3d**). This indicates that  $\beta$  tongue APT2  
207 mutants, which failed to bind to liposomes, also remained cytosolic when expressed  
208 in cells and underwent rapid proteasome-mediated degradation.

209

Figure 3

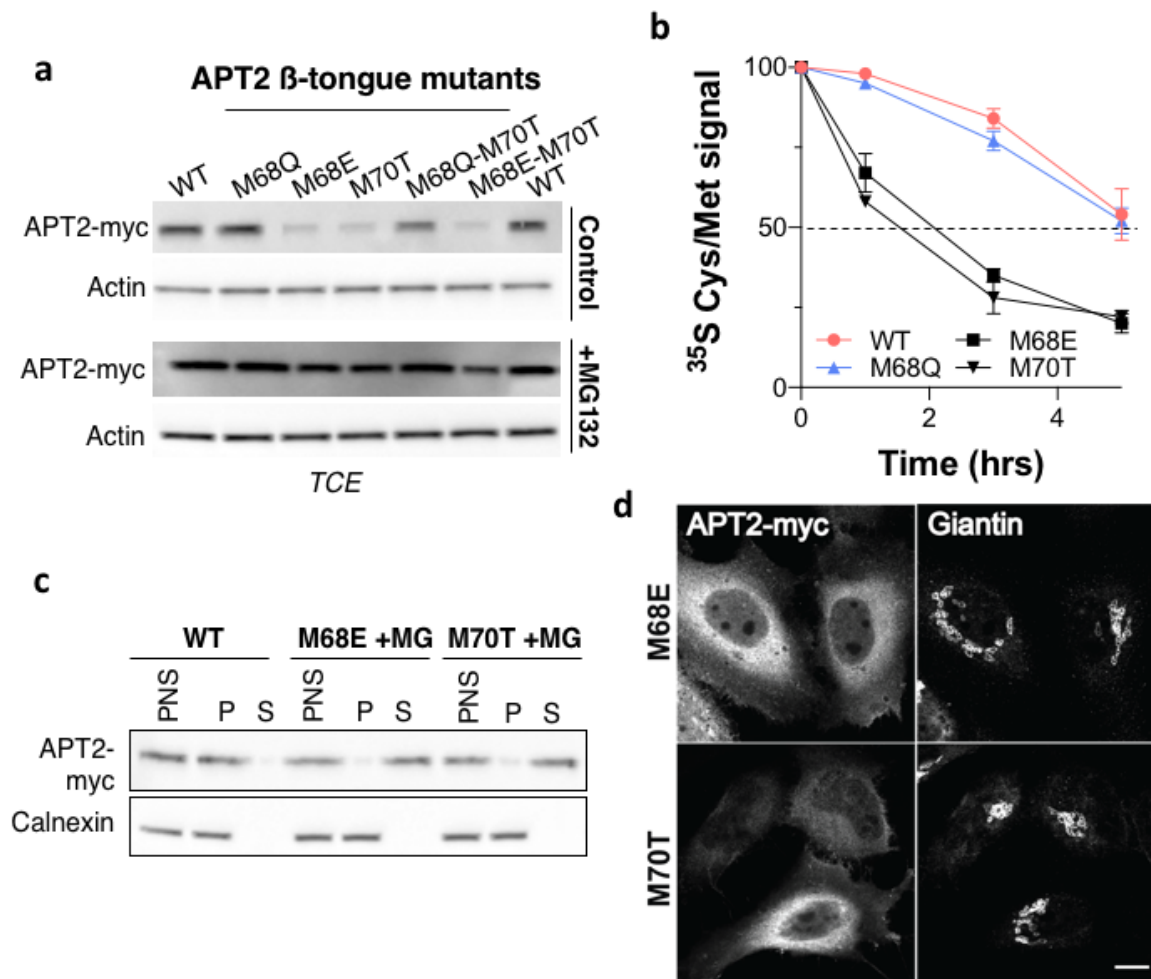

**Figure 3: APT2  $\beta$  tongue mutants are cytosolic and unstable.** **a.** Cells expressing WT or mutant APT2-myc for 24 h were incubated for 4 h with MG132. Protein extracts (40  $\mu\text{g}$ ) were separated via SDS-PAGE and analyzed by immunoblotting with anti-myc antibodies. Anti-actin antibodies were used as a loading control. **b.** HeLa cells were transfected with different APT2-myc constructs for 24 h. Cells were pulsed with  $^{35}\text{S}$  Cys/Met for 20 min and were chased for the indicated time before immunoprecipitation and SDS-PAGE. Degradation kinetics were analyzed by autoradiography and were quantified using the Typhoon Imager.  $^{35}\text{S}$ -Met/Cys incorporation was quantified for each time point and was normalized to protein expression levels.  $^{35}\text{S}$ -Met/Cys incorporation was set to 100% for  $t = 0$  after the 20-min pulse, and all chase times were expressed relative to this ( $n = 3$ , error bars represent standard deviation). **c.** HeLa cells were transfected with plasmids encoding WT or mutant APT2-myc for 24 h. Where applicable, cells were incubated for 4 h with MG132. Post-nuclear supernatants (PNS) were prepared and ultra-centrifuged to separate membrane (P) from cytosolic (S) fractions. Equal volumes were loaded on a 4–20% gradient SDS-PAGE gel and were analyzed by immunoblotting with anti-myc and anti-Calnexin antibodies. **d.** Confocal microscopy images of HeLa cells transfected with plasmids encoding APT2-myc mutants for 24 h. Cells were incubated for 4 h with MG132 and were immunolabeled for APT2-myc and giantin. Scale bar: 10  $\mu\text{m}$ .

210

211

212

## 213 **Stable membrane association of APT2 requires S-acylation of Cys2**

214       The cytosolic distribution of APT2  $\beta$  tongue mutants differs significantly from  
215 that of the WT protein, which shows a marked accumulation on the Golgi apparatus  
216 (**Fig. 4a**). This Golgi localization was previously reported and found to be dependent  
217 on Cys2 (Kong *et al*, 2013; Vartak *et al*, 2014) and its likely S-acylation. Using the C2S  
218 mutant, we confirmed that palmitoylation occurs on Cys2 (**Supplementary Fig. 2a**)  
219 and that the WT protein accumulates on the Golgi in a Cys2-dependent manner (**Fig.**  
220 **4a**). In agreement with the microscopy (**Fig. 4a**), the C2S mutant was mostly found in  
221 the cytosolic fraction after high speed centrifugation of the PNS, in contrast to the WT  
222 protein that was mostly found in the pellet, consistent with a membrane association  
223 (**Fig. 4b**).

224       Since  $\beta$  tongue mutants are rapidly degraded in cells, we wondered whether S-  
225 acylation, which also affects membrane binding, would similarly influence APT2  
226 turnover rates. We performed  $^{35}\text{S}$ -Cys/Met metabolic pulse-chase experiments on WT  
227 and C2S in the presence or absence of the general protein deacylation inhibitor  
228 Palmostatin B. The C2S mutant had a shorter apparent half-life ( $\approx 3$  h) than the WT  
229 protein ( $\approx 5$  h) (**Fig. 4c** and **S3b**). As expected, the decay of C2S was not affected by  
230 Palmostatin B treatment. In contrast, degradation of the WT protein was drastically  
231 slowed by Palmostatin B, with the half-life increasing to more than 20 h (**Fig. 4c** and  
232 **S2bc**). This is not due to an effect of membrane binding on protein stability *per se*,  
233 since the melting curve of APT2 was the same in solution and when bound to  
234 liposomes (**Supplementary Fig. 2d**). Instead, the cellular instability likely indicates that  
235 the acyl modification affects recognition of APT2 by a cytosolic quality control  
236 mechanism.

237 The S-acylation of APT2 is thus required for stable membrane association, and  
 238 this modification drastically affects APT2 turnover rates in the cellular context. The  
 239 strongly stabilizing effect of Palmostatin B also suggests that APT2 undergoes  
 240 significant depalmitoylation in cells, an issue we will address in future studies.

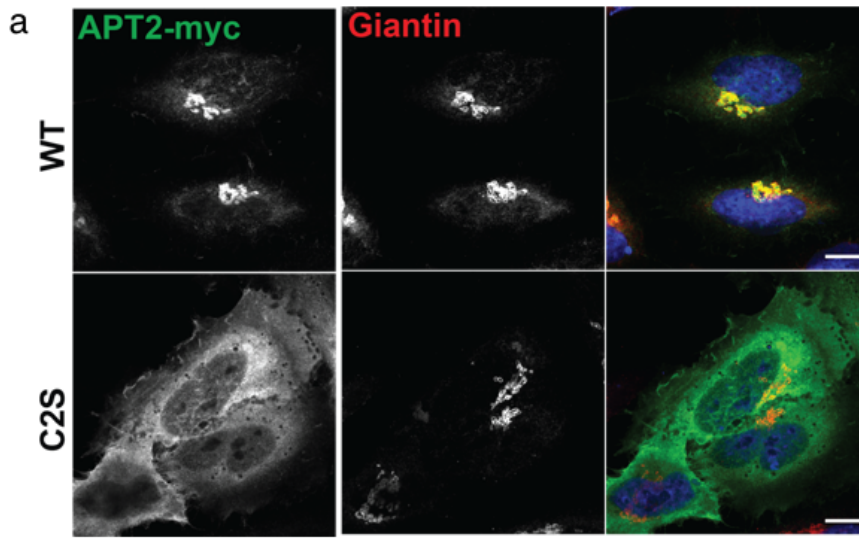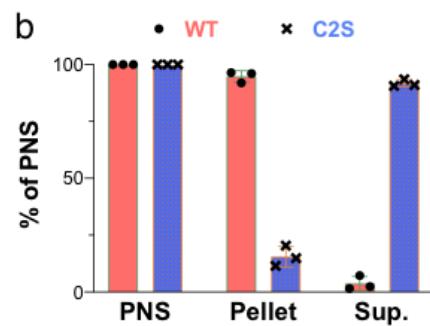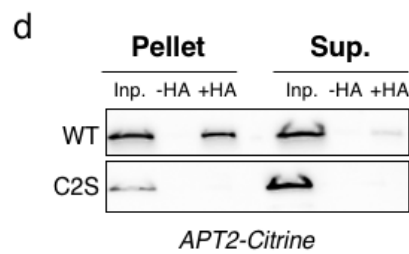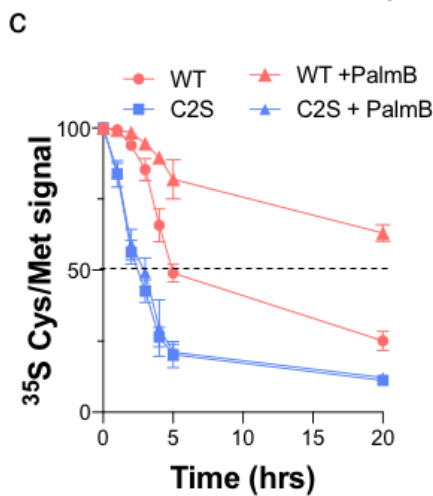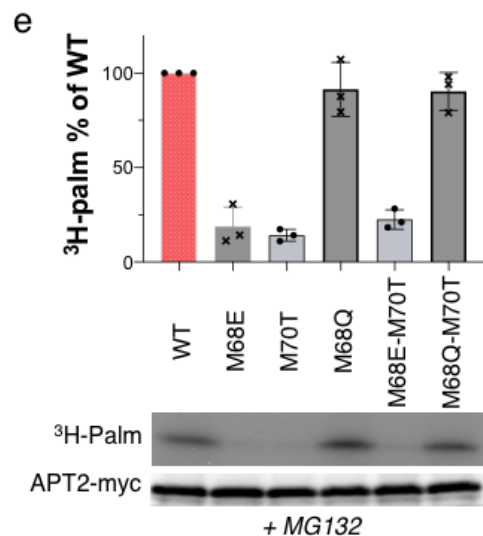

241

**Figure 4: Effect of S-acylation on APT2 localization and stability.** **a.** Cellular localization of APT2 mutants. Confocal microscopy images of HeLa cells transfected with plasmids encoding WT or C2S APT2-myc for 24 h and immunolabeled for APT2 and giantin. The nuclei were stained with Hoechst. Scale bar: 10  $\mu$ m. **b.** HeLa cells were transfected with plasmids encoding WT or C2S APT2 for 24 h. PNS were ultra-centrifuged to separate the membrane (Pellet) and cytosolic (Sup.) fractions. Equal volumes were analyzed by SDS-PAGE. Quantification of the APT2 membrane association was performed by setting the amount of APT2 in PNS to 100%, and the amount of WT or C2S APT2 in the pellet or supernatant were expressed relative to this (n = 3, error bars represent standard deviation). **c.** HeLa cells were transfected with different APT2-myc constructs for 24 h, treated or not for 4 h with Palmostatin B, pulsed with  $^{35}$ S Cys/Met for 20 min and then chased for the indicated time before immunoprecipitation and SDS-PAGE. Degradation kinetics were analyzed by autoradiography and were quantified using the Typhoon Imager.  $^{35}$ S-Met/Cys incorporation was quantified for each time point and was normalized to protein expression levels.  $^{35}$ S-Met/Cys incorporation was set to 100% for t = 0 after the 20-min pulse, and the different chase times were expressed relative to this (n = 3, error bars represent standard deviation). **d.** HeLa cells were transfected with plasmids encoding WT or C2S APT2-citrine constructs for 24 h. PNS were ultra-centrifuged to separate the membrane (Pellet) and cytosolic (Sup.) fractions. The amount of palmitoylated protein was determined using Acyl-RAC. For each input (Inp.), palmitoylated proteins were detected after hydroxylamine treatment (+HA). Equal volumes were analyzed by SDS-PAGE and immunoblotting with anti-GFP antibodies. **e.** HeLa cells were transfected with plasmids encoding WT or the indicated APT2-myc mutants for 24 h. Cells were treated for 4 h with MG132 and were then metabolically labeled for 3 h at 37°C with  $^3$ H-palmitic acid. The proteins were extracted, immunoprecipitated with myc antibodies, separated via SDS-PAGE, and analyzed by autoradiography ( $^3$ H-palm), which was quantified using the Typhoon Imager or by immunoblotting with anti-myc antibodies. The calculated value of  $^3$ H-palmitic acid incorporation into WT APT2 was set to 100%, and mutants were expressed relative to this (n = 3, error bars represent standard deviation).

242

## 243 **APT2 membrane association occurs through a two-step mechanism**

244 We next investigated the steady state S-acylation status of APT2 in cells by  
245 performing a capture assay for S-acylated proteins termed Acyl-RAC. We analyzed  
246 both the cytosolic and pellet fractions of the PNS. Acylated WT APT2 was readily  
247 detectable in the pellet fraction, but not in the supernatant (**Fig. 4d**), indicating that the  
248 fraction of soluble APT2 is not S-acylated.

249 Given that the  $\beta$  tongue mutants were also found in the soluble fraction, this  
250 suggests that despite the presence of the cysteine at position 2, these mutants might  
251 not be able to undergo S-acylation. To test this,  $\beta$  tongue mutants were expressed in  
252 HeLa cells and their degradation was prevented by MG132 treatment. The  
253 incorporation of  $^3$ H-palmitate was monitored. While palmitoylation of WT APT2 was

254 readily observed, the membrane-binding-deficient  $\beta$  tongue mutants did not undergo  
255 detectable palmitoylation (**Fig. 4e**).

256 These observations altogether indicate that APT2 undergoes a two-step  
257 membrane-binding process in the cell: (i) electrostatic interactions bring APT2 to the  
258 membrane, where the  $\beta$  tongue dips into the membrane to hold the APT2 temporarily  
259 in place. This is necessary for APT2 to encounter its S-acylating enzyme(s), (ii) leading  
260 to the lipidation of Cys2 and a stable membrane association. The effect of palmostatin  
261 B on APT2 stability further indicate that APT2 can undergo deacylation and membrane  
262 release.

263

#### 264 **APT2 S-acylation is required for in vivo activity and is mediated by ZDHHC3 and 7**

265 We next analyzed whether S-acylation is important for APT2 activity, as APT2  
266 is a soluble enzyme and its targets are membrane bound. As a readout for activity, we  
267 monitored the APT2-dependent depalmitoylation of one of its targets, the zDHHHC6  
268 protein. Endogenous APT2 expression in cells was silenced and subsequently  
269 complemented with either WT or C2S APT2. The cells were pulsed for 2 h with  $^3\text{H}$ -  
270 palmitate and chased for 0 or 3 h to allow APT2-mediated depalmitoylation. zDHHHC6  
271 was then immunoprecipitated, and its palmitoylation level was monitored by  
272 autoradiography. Upon expression of WT APT2, depalmitoylation of ZDHHC6 was  
273 observed at 3 h (**Fig. 5a**), as expected for the normal function of APT2. However, C2S  
274 APT2 failed to mediated ZDHHC6 depalmitoylation (**Fig. 5a**), indicating that the S-  
275 acylation site at position 2 is necessary for APT2 activity.

276 Given the importance of S-acylation on APT2 localization, cellular stability, and  
277 activity, we performed a screen to identify the ZDHHC enzyme(s) responsible for  
278 modifying APT2. Because APT2 accumulates on the Golgi when acylated, we could



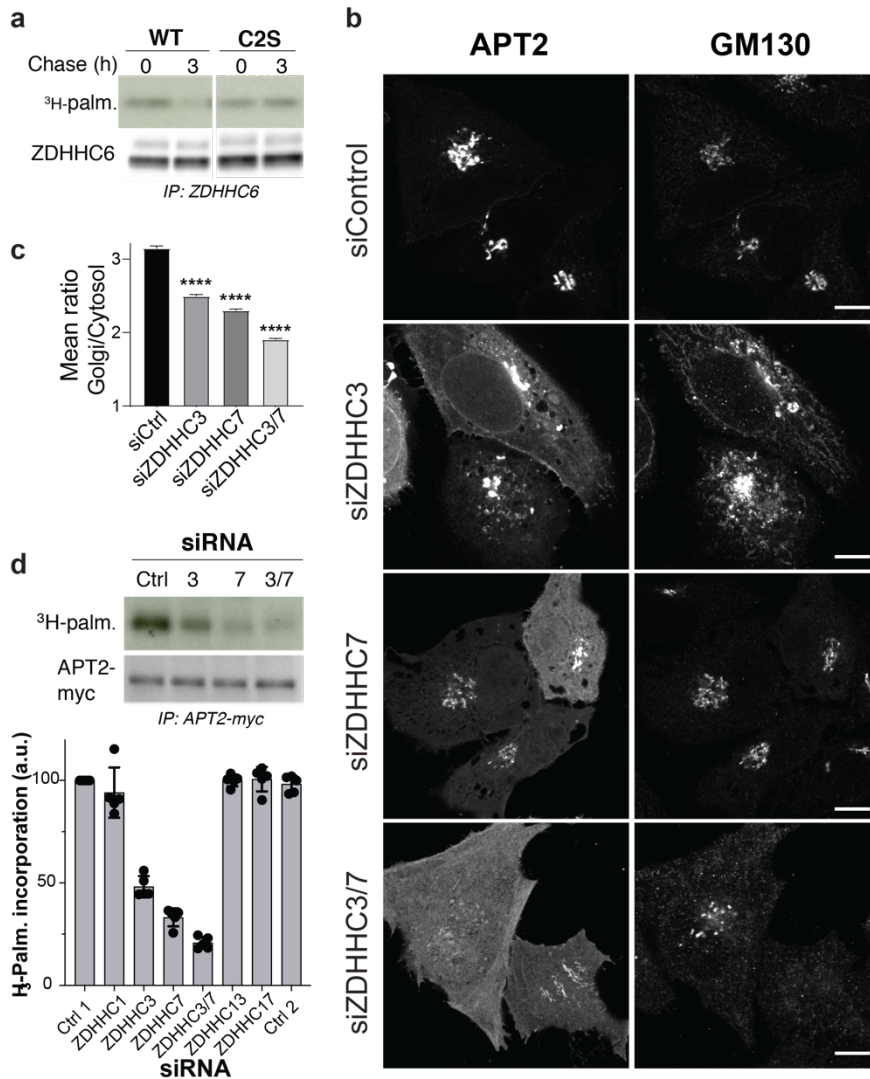

**Figure 5: APT2 S-acylation is mediated by ZDHHCs 3 and 7 and is required for activity. a.** HeLa cells were silenced for 3 days with APT2 RNAi (in 3' non-coding sequence) transfected with plasmids encoding myc-tagged WT ZDHHC6 and APT2 WT or C2S for 24 h. The cells were then metabolically labeled for 2 h at 37°C with <sup>3</sup>H-palmitic acid and were chased for 3 h in new complete medium. Proteins were extracted, immunoprecipitated with anti-myc antibodies, subjected to SDS-PAGE, and analyzed by autoradiography (<sup>3</sup>H-palm) or by immunoblotting with anti-myc antibodies. **b.** Confocal microscopy images of HeLa cells transfected with siRNAs against ZDHHC3, 7 or both, plasmids encoding APT2-citrine for 24h, and immunolabelled for GM130. Scale bar: 10 μm **c.** High-throughput automated immunofluorescence quantification of HeLa cells processed as in **b**, depicting the ratio of APT2 mean intensity values between the Golgi (marked by GM130) and the cytosol (cell mask without nuclei and Golgi). At least 2200 cells were analyzed per condition and results are mean ± SEM p\*\*\*\*<0.0001. Equivalent results were obtained for two independent analysis. **d.** HeLa cells were transfected with siRNAs against ZDHHC3, 7 or both and a plasmid encoding APT2-myc, then metabolically labeled for 2 h at 37°C with <sup>3</sup>H-palmitic acid. Proteins were extracted, immunoprecipitated with anti-myc antibodies, subjected to SDS-PAGE, and analyzed by autoradiography (<sup>3</sup>H-palm) or by immunoblotting with anti-myc antibodies (n = 5, error bars represent standard deviation).

279 screen by fluorescence microscopy. We first silenced ZDHHC enzymes by dividing  
 280 them into 6 pools. Silencing pool M1, containing siRNAs against ZDHHC 1, 3, 7, 13,

281 and 17, led to the Golgi release of APT2 (**Supplementary Fig.3**). We subsequently  
282 silenced each ZDHHC enzyme individually and found that none of them led to the  
283 complete release of APT2 from the Golgi. We therefore silenced them in pairs and  
284 found that the simultaneous silencing of ZDHHC3 and 7 (**Fig. 5bc** and **S3**), but not for  
285 example 13 and 17 (**Supplementary Fig.3**), led to APT2 release. We could confirm  
286 ZDHHC3- and 7-dependent palmitoylation of APT2 by <sup>3</sup>H-palmitate incorporation (**Fig.**  
287 **5d**).

288

### 289 **Control of APT2 turnover by the $\beta$ tongue**

290 The dual interaction of APT2 with the membrane, via the  $\beta$  tongue and through  
291 lipidation of Cys2, allows stable membrane association, though also appears to protect  
292 APT2 from proteasomal degradation. To understand this protective mechanism, we  
293 searched for lysine residues that could be targets for ubiquitination. APT2 contains 6  
294 lysines in total, one of which appears ideally positioned at the very tip of the  $\beta$  tongue,  
295 Lys-69 (**Fig. 6a**). We generated K69R mutants for the WT protein and the  $\beta$  tongue  
296 mutants. Remarkably, the K69R mutation led to a full rescue of the expression of the  
297 membrane-binding-deficient  $\beta$  tongue mutants and a loss of the ubiquitination signal  
298 (**Fig. 6b**). Introducing the K69R mutation also led to an increase in the expression of  
299 the C2S mutant (**Fig. 6b**). These observations reveal that APT2 has a built-in  
300 mechanism whereby soluble APT2, through the exposure of Lys-69, can be  
301 ubiquitinated and targeted to degradation, while membrane-bound APT2 dips Lys69  
302 in the membrane, hiding it from the ubiquitin ligase.

303 Rescuing the expression of the  $\beta$  tongue mutants by the K69R mutation was  
304 however insufficient to confer *in vivo* deacylating activity, as monitored by measuring  
305 the APT2-dependent depalmitoylation of ZDHHC6 (**Fig. 6cd**). These observations

306 confirm that the ability of APT2 to deacylate target proteins in cells requires both the  
 307  $\beta$  tongue and acylation of Cys2.

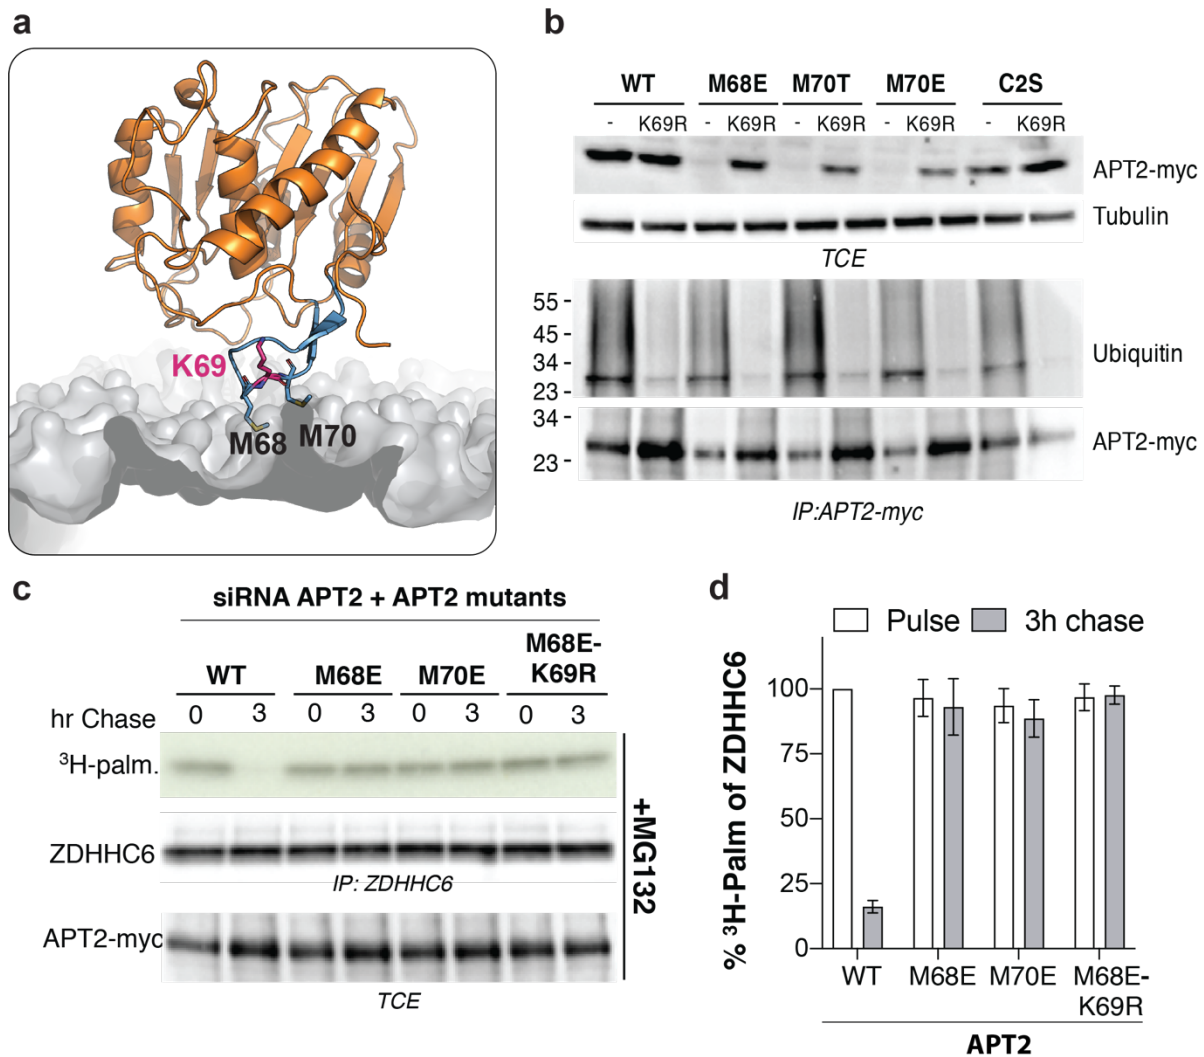

308

**Figure 6: APT2  $\beta$  tongue mutants undergo ubiquitination on Lys-69 but not S-acylation.** **a.** Ribbon diagram of membrane-bound APT2. **b.** HeLa cells expressing WT or mutant APT2 for 24 h were lysed and immunoprecipitated with anti-myc agarose beads overnight. Protein extracts (40  $\mu$ g) and immunoprecipitated products were separated via SDS-PAGE and analyzed by immunoblotting with anti-myc or anti-ubiquitin antibodies. Anti-tubulin antibodies were used as a loading control. **c.** HeLa cells were silenced for 3 days with APT2 siRNA (in 3' non-coding sequence) and were transfected with plasmids encoding myc-tagged WT ZDHHC6 and the indicated APT2 constructs for 24 h. Cells were incubated for 4 h with MG132 and then were metabolically labeled for 2 h at 37°C with <sup>3</sup>H-palmitic acid and chased for 3 h in new complete medium. Proteins were extracted, immunoprecipitated with anti-myc antibodies, subjected to SDS-PAGE, immunoblotted with anti-myc antibodies, and analyzed by autoradiography (<sup>3</sup>H-palm). The total extracts (40  $\mu$ g) were immunoblotted with anti-myc antibodies to detect WT and mutant APT2. **d.** Quantification of <sup>3</sup>H-palmitic acid incorporation into ZDHHC6 in the presence of different APT2 mutants. Values were normalized to protein expression level. The calculated value of <sup>3</sup>H-palmitic acid incorporation into ZDHHC6 with WT APT2 was set to 100%, and the mutants were expressed relative to this (n = 3, error bars represent standard deviation).

## 309 Identification of a palmitate binding pocket in APTs

310 To further understand how APTs act on their substrates, we reanalyzed our crystal  
311 structures of APT1. We noticed that about one third of the proteins in the asymmetric  
312 unit contained a fatty acid in a hydrophobic pocket in the vicinity of the catalytic site  
313 (**Fig. 7a, Supplementary Fig.4a**). The electron-density maps specifically identified a  
314 palmitic acid (C16:0) with the carboxylate group facing the catalytic Ser119. We  
315 therefore extracted the ligand with ethanol and performed ultraperformance liquid  
316 chromatography (UPLC) quadrupole-time-of-flight mass spectrometry (Q-TOF-MS)  
317 analysis to confirm the presence of the palmitic acid in all three structures (WT, C2S,  
318 and S119A APT1) (**Fig. 7b**). Since the fatty acid was not added during expression in  
319 *E. coli*, purification, or crystallization, it must have been retained during purification, as  
320 was previously observed for other proteins (Ngaki *et al*, 2012).

321 Recently, the structure of the human protein acyltransferase hDHHC20 was  
322 solved as an acylated intermediate mimic (Rana *et al*, 2018), which provided insight  
323 into the localization of the palmitic acid. The acylated version was obtained by using  
324 the covalent ZDHHC inhibitor 2-bromopalmitate (2-BP). Consequently, we wanted to  
325 test whether incubating APT1 with 2-BP could be used to fully occupy the hydrophobic  
326 pocket in all molecules of the asymmetric unit, to confirm the existence of this acyl  
327 chain binding pocket. We first verified whether the catalytic activity of APT1 and APT2  
328 could be inhibited by 2-BP. Remarkably, 2-BP was as efficient in blocking APT2 as its  
329 specific inhibitor ML349 (**Supplementary Fig.4b**). Consistently, 2-BP also inhibited  
330 the APT2-mediated depalmitoylation of ZDHHC6 (**Supplementary Fig.4cd**). 2-BP  
331 also inhibited APT1, but with a lower affinity (**Supplementary Fig.4b**). Nonetheless,  
332 the crystallization of APT1 in the presence 2-BP led to the presence of palmitate in all  
333 proteins of the unit cell (**Supplementary Fig.1e**).

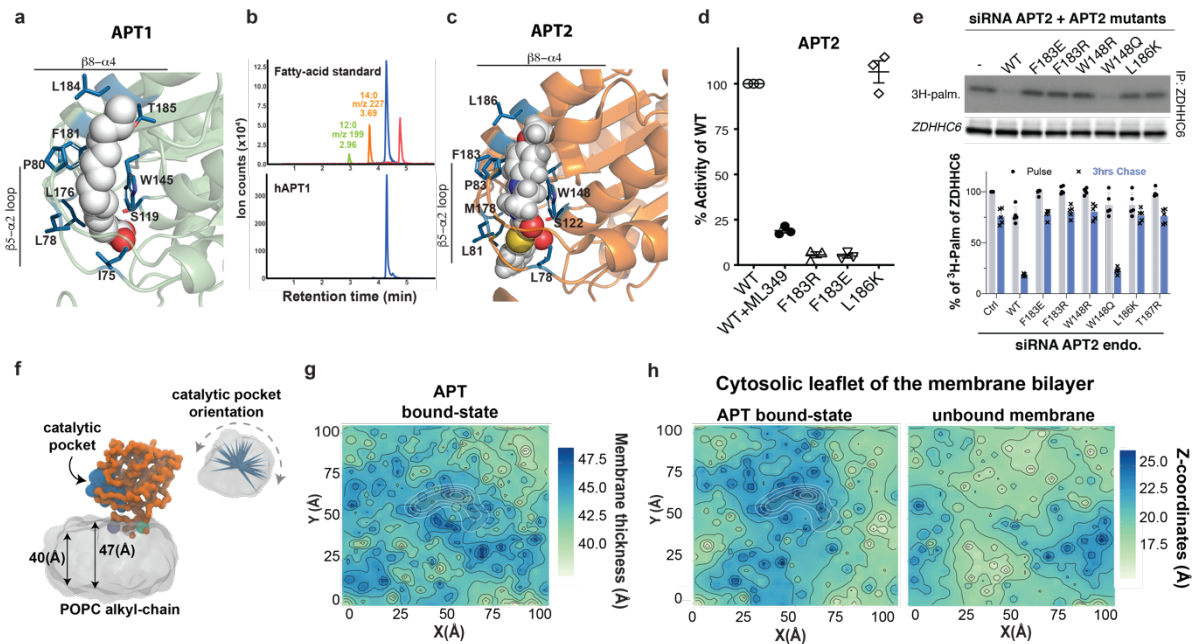

**Figure 7: Identification of acyl chain binding pocket in APTs.** **a.** Close-up view of the hydrophobic channel of APT1 with palmitic acid. The palmitic acid is represented in van der Waals representation. The side-chain of residues forming the hydrophobic cavity are shown as blue sticks. **b.** Analysis of the ligands associated with purified APT1 enzyme detected by Q-TOF-MS. **c.** Close-up view of the hydrophobic channel of APT2 with ML349. ML349 is represented in van der Waals representation. The side-chain of residues forming the hydrophobic cavity are shown as blue sticks. **d.** The thioesterase activity of the APT2 hydrophobic pocket mutants was determined at 60 min after the addition of substrate and detergent. The APT2-specific inhibitor ML349 was included as a positive control. Technical replicates were averaged within each experiment, and each experiment was then normalized to WT. The average of each experiment was graphed. Two-tailed two-sample unequal variance t-tests were performed on the raw values normalized to the plate. **e.** ZDHHC6 palmitoylation upon overexpression of APT2 pocket mutants. HeLa cells were silenced for 3 days with APT2 RNAi (in 3' non-coding sequence) and were transfected with plasmids encoding myc-tagged WT ZDHHC6 and the indicated APT2 constructs for 24 h. The cells were then metabolically labeled for 2 h at 37°C with  $^3$ H-palmitic acid and were chased for 3 h. Proteins were extracted, immunoprecipitated with anti-myc antibodies, separated via SDS-PAGE, immunoprecipitated with anti-myc antibodies, and analyzed by autoradiography ( $^3$ H-palm). The total extracts (40  $\mu$ g) were immunoblotted with anti-myc antibodies to determine the expression level of WT and mutant APT2. The calculated value of  $^3$ H-palmitic acid incorporation into ZDHHC6 with WT APT2 was set to 100%, and the mutants were expressed relative to this (n = 3, error bars represent standard deviation). **f.** Representative snapshot of membrane-bound APT2 state. In orange, the APT2 protein. The catalytic pocket is shown as blue surface, and the membrane bilayer in grey. **g.** MD-averaged membrane-thickness. In white the space explored by the protein during the simulation. **h.** Averaged phosphate Z-coordinates for the APT-bound and APT-unbound states. The dashed line highlighted the membrane bounded region explored by APT during the simulation.

335 We next wanted to study the function of this binding site in more detail. The site  
336 encompasses a largely non-polar cavity that sequesters the aliphatic chain of the  
337 palmitic acid. The residues composing this hydrophobic binding pocket belong to  
338 several secondary structural elements. For instance, the entrance of the pocket is  
339 located close to the loop between helices S3-S4 (**Supplementary Fig.4f**, Leu78,  
340 Ser79, and Pro80) and is solvent accessible. The top of the channel is formed by  
341 residues from helix E (Phe181 and Leu184), while the residues Cys144, Trp145,  
342 Leu146, and Pro147 contribute to the end of the pocket (**Supplementary Fig.4f**).  
343 Finally, several residues near the active site form the rest of the channel: Leu30, Ile75,  
344 Ile76, and Leu176 (**Supplementary Fig.4f**). The shape and size of the hydrophobic  
345 channel varied between the apo and the palmitate-containing forms of APT1. In the  
346 apo form, the hydrophobic channel was somewhat closed, due to the movement of  
347 the S3-S4 loop and the adjacent E helix (**Supplementary Fig.4g**). Rearrangement of  
348 residues Leu78, Phe181, and Leu184 modulated the surface area of the pocket. The  
349 difference between the volumes of the opened ( $226 \text{ \AA}^3$ ) and the closed channel  
350 conformation ( $124 \text{ \AA}^3$ ) corresponds roughly to the rearrangement of the residues  
351 responsible for regulating lipid access.

352 We next modeled palmitate into the corresponding pocket of APT2 (**Fig. 7c**).  
353 This allowed us to identify residues involved in the formation of the pocket, such as  
354 Trp148, Phe183, Leu186, and The187. We produced recombinant F183R, F183E, and  
355 L186K APT2 mutants and tested their deacylation activity *in vitro*. Mutating Phe183  
356 abolished the acylthioesterase activity, while mutating Leu186 had no effect (**Fig. 7d**).  
357 For *in vivo* activity testing, we probed a larger panel of mutants. All six mutants were  
358 well expressed (**Supplementary Fig.5a**) and underwent S-palmitoylation  
359 (**Supplementary Fig.5b**). However, with the exception of the W184Q mutant, all

360 hydrophobic pocket mutants tested (F183E, F183R, W148R, L186R, T187R) failed to  
361 depalmitoylate ZDHHC6 (**Fig. 7e** and **S7c**), showing that the hydrophobic pocket of  
362 APT2 is essential for its protein acylthioesterase activity.

363 Altogether, these observations indicate that the acyl chain of a palmitoylated  
364 substrate protein needs to access this newly discovered APT hydrophobic pocket for  
365 hydrolysis to occur. This means that the acyl chain must first be extracted from the  
366 membrane containing the APT2 target protein. We wondered whether APT2 may  
367 affect the membrane's structure in a manner that would favor movement of the acyl  
368 chain out of the bilayer. To evaluate this possibility, we monitored the thickness of the  
369 lipid bilayer upon interaction of APT2 with the membrane during the MD trajectories  
370 (**Fig. 7f**). We observed a correlation between the presence of APT2 and the  
371 membrane thickness: while in the absence of APT2, the average membrane thickness  
372 is ~40 Å, when APT2 interacts with the membrane, the thickness increased to ~47 Å  
373 (**Fig. 7g**). The protein perturbs mostly the upper leaflet of the bilayer by increasing its  
374 thickness locally from 17 Å to 25 Å (**Fig. 7h**). Although simulations at this level of  
375 theory cannot explore the complete deacylation reaction mechanism, the local  
376 membrane deformation promoted by APT2 can facilitate the localization of  
377 palmitoylated substrates closer to the active site and favor the extraction of the  
378 palmitoylated cysteine residue from the membrane bilayer to be accommodate into  
379 the identified hydrophobic pocket.

380

## 381 **DISCUSSION**

382 Though acyl protein thioesterases are critical components of the acylation-  
383 deacylation-regulated protein localization and function (Blanc *et al*, 2019; Zaballa &  
384 van der Goot, 2018), little is known about how they act in cells and how they are

385 controlled. Combining structural biology, molecular simulations, mutagenesis, and *in*  
386 *vivo* assays, we herein studied the mode of action of the thioesterase APT2. Through  
387 this work, we discovered how APT2 approaches membranes to stably associate with  
388 them, how it extracts the acyl chain that is to be removed from its targets, and how  
389 cells regulate the cellular amounts of APT2 through two counteracting post-  
390 translational modifications, S-acylation and ubiquitination.

391 Our structural studies showed that APT2 exposes a mildly hydrophobic loop,  
392 the  $\beta$  tongue, on its surface that allows it to interact with liposomes. Interestingly, the  
393  $\beta$  tongue is insufficient to mediate stable interactions with membranes in the cellular  
394 context, pointing towards some lipid or curvature specificity that remains to be  
395 analyzed. We could determine that the stable binding of APT2 to cellular membranes  
396 requires two steps: (i) long range electrostatic interactions caused by patches of  
397 positively charged residues that allow APT2 to approach membranes and dip in its  $\beta$   
398 tongue, and (ii) S-acylation of Cys2 by the acyltransferases ZDHHC3 or 7. This S-  
399 acylation is required for APT2 to be active in cells, presumably because APT2 needs  
400 to have a sufficient dwell time on membranes to encounter its membrane-associated  
401 S-acylated target proteins.

402 The crystallization studies also led us to a hydrophobic pocket in APT2 that can  
403 accommodate palmitate. We determined that mutations in this pocket can inhibit the  
404 activity of the enzyme, *in vitro* and *in vivo*, without affecting its membrane binding  
405 capacity. The importance of this pocket indicates that upon interaction of APT2 with a  
406 S-acylated target protein, the target-bound acyl chain transfers from the membrane to  
407 the hydrophobic pocket of APT2. This movement positions the thioester bond between  
408 the target protein and the acyl chain near the APT2 catalytic site for hydrolysis. An  
409 analysis of the MD simulations of the interaction of APT2 with the membrane indicated



410 that beneath the catalytic pocket, APT2 triggers a membrane deformation, pulling up  
411 the lipid monolayer towards the protein. Future studies will address whether this APT2-  
412 induced membrane deformation is sufficient to trigger acyl chain extraction and  
413 capture by the hydrophobic pocket.

414 The present work also suggests that cells tightly control the levels of cytosolic  
415 APT2. APT2 indeed has a build-in mechanism that targets it to degradation when free  
416 in the cytosol. This is mediated by the presence of a ubiquitination site (Lys69) within  
417 the  $\beta$  tongue, which is thus inaccessible when the protein is bound to a given  
418 organelle. Why excess APT2 is deleterious to the cell remains to be understood.

419 All together our work reveals the following mode of action for APT2: soluble  
420 APT2 weakly interacts with cellular membranes via its  $\beta$  tongue; in this state, it can  
421 detach from the membrane or encounter ZDHHC3 or 7, which can add an acyl chain  
422 to Cys2, allowing APT2 to stably bind and explore the membrane in search of potential  
423 substrates. Upon encounter with a substrate, APT2 triggers extraction of the acyl chain  
424 from the membrane allowing it to move into the APT2 hydrophobic pocket. With this  
425 ideal positioning hydrolysis may occur. Membrane bound APT2 can itself undergo  
426 deacylation, as suggested by the stabilizing effect of palmostatin B (**Fig. 4c**), and  
427 subsequent release from the membrane. APT2 does not have the ability  
428 depalmitoylate itself (Kong *et al*, 2013), and thus the involved acyl protein thioesterase  
429 remains to be identified. The cycle can then repeat itself on the same or a different  
430 membrane compartment. In its cytosolic form, however, APT2 is vulnerable to  
431 ubiquitination on Lys69 in the  $\beta$  tongue, which targets it to the proteasome for  
432 degradation.

433 Overall, these studies on APT2 have shown us how a key regulator of S-  
434 acylation functions and is itself controlled. With this information, we can now start

435 addressing the dynamics and spatio-temporal regulation that allow a single enzyme to  
436 modify many targets proteins that localize to different compartments of the  
437 endomembrane system.

438

## 439 **MATERIALS AND METHODS**

### 440 **Cell lines**

441 HeLa cells (ATCC) were grown in complete modified Eagle's medium (MEM, Sigma)  
442 at 37°C, supplemented with 10% fetal bovine serum (FBS), 2 mM L-Glutamine,  
443 penicillin, and streptomycin.

444

### 445 **Plasmids and transfection**

446 Human influenza hemagglutinin (HA), Myc or Cltrln fusions of APT1 or APT2 were  
447 inserted into pcDNA3.1-N1. All mutations of APT1 and APT2 were obtained using a  
448 Quikchange mutagenesis kit (Stratagene). The Myc fusion of ZDHHC6 was cloned in  
449 pcDNA3.1. For the control transfection, we used an empty pcDNA3 plasmid. Plasmids  
450 were transfected into HeLa cells for 24 h (2 µg of cDNA/9.6 cm<sup>2</sup> plate) using Fugene  
451 (Promega). For gene silencing, HeLa cells were transfected for 72 h with  
452 100 pmol/9.2 cm<sup>2</sup> dish of siRNA using the Interferin (Polyplus) transfection reagent.  
453 For the control siRNA, we used the following target sequence from the viral  
454 glycoprotein VSV-G: 5'-ATTGAACAAACGAAACAAGGA-3'. siRNA against the human  
455 APT2 gene were targeted to the 3' non-coding region (APT2 target sequence: 5'-  
456 CAGCTGCTTCTCAGTCATGAA-3'). siRNAs against all human ZDHHC genes were  
457 the same as previously published (Lakkaraju *et al*, 2012).

458

### 459 **Antibodies and drugs**

460 The following primary antibodies are used: mouse anti-Calnexin (Millipore, MAB3126,  
461 RRID: AB\_2069152), mouse anti-Tubulin (Sigma, T5168, RRID: AB\_477579), mouse  
462 anti-Actin (Millipore, MAB1501, RRID: AB\_2223041), rat anti-HA-HRP (Roche,  
463 12013819001, RRID: AB\_390917), mouse anti-Myc (SIGMA, 9E10 M4439, RRID:  
464 AB\_439694), mouse anti-Ubiquitin (Enzo, P4D1, PW0930, RRID: AB\_1181462), rat  
465 anti-HA (Roche, 3F10, RRID: AB\_390918), rabbit anti-Giantin (Abcam, ab24586,  
466 RRID: AB\_448163), anti-GM130 (BD, clone35, RRID\_398141), anti-FLAG (sigma,  
467 M2, RRID\_259529). The anti-HA affinity gel (Roche, 1815016001, RRID: AB\_390914)  
468 or anti-MYC affinity agarose gel (Pierce, PIER20169) were used for  
469 immunoprecipitation.

470 Drugs were used as follows: MG132 at 10  $\mu$ M (Sigma, C2211), 4 h at 37°C.  
471 Palmostatin B at 1  $\mu$ M (Calbiochem, 178501), indicated time at 37°C. 2-  
472 Bromopalmitate (2-BP; Focus Biomolecules, FBM-10-3284) at 100  $\mu$ M at 37°C during  
473 the indicated time.

474

#### 475 **Expression and purification of human acyl protein thioesterases (APT) 1 and 2**

476 Human APT1 and APT2 wildtype and mutant proteins were expressed and purified as  
477 described elsewhere (Devedjiev *et al*, 2000) with minor modifications. Briefly, BL21  
478 [DE3] (Novagen 70235-3) harboring the appropriate plasmids were grown at 37°C to  
479 OD<sub>600</sub> = 0.6. Protein expression was induced by the addition of IPTG to 0.8 mM and  
480 cultures were grown for an additional 18 h at 16°C. Cells were lysed by sonication in  
481 ice-cold H Buffer (50 mM Tris-HCl pH 8.0, 150 mM NaCl), and cellular debris was  
482 pelleted by centrifugation at 15,000  $\times$  g for 30 min at 4°C. The supernatant was loaded  
483 on a HisTrap HP (GE LifeSciences 17524802), and protein was eluted in H Buffer  
484 containing 250 mM imidazole. Where applicable, the N-terminal His6-tag was

485 removed by the addition of His6-rTEV protease (Life Technologies) and dialyzed in H  
486 Buffer for 36 h at 4°C. Cleaved protein was harvested, and DTT and EDTA were added  
487 to concentrations of 5 mM and 1 mM, respectively.

488

#### 489 **Circular dichroism (CD) spectroscopy**

490 Circular dichroism (CD) spectra of APT2 were collected using a Chirascan V100  
491 (Applied Biophysics) and 1 mm pathlength quartz cuvettes (Hellma 110-QS). Spectra  
492 were collected in triplicate at 1 nm intervals between 280 and 207 nm. The  
493 temperature of the 6-cuvette holder was monitored and controlled by a Quantum  
494 Northwestern CD 250 Peltier system. For denaturation curves, the temperature of the  
495 sample was increased from 4°C to 94°C by 2°C intervals; spectra were collected at  
496 each temperature following a 30 s equilibration period.

497

#### 498 **Thioesterase Activity Assay**

499 The thioesterase activity assay was modified from Kemp et al. (Kemp *et al*, 2013).  
500 Recombinant APT was preincubated for 10 min at room temperature with either  
501 DMSO or inhibitor in DMSO, where applicable. The reaction was initiated by the  
502 addition of 4-methylumbelliferyl palmitate (Santa Cruz Biotechnology sc-214256,  
503 PubChem CID 87248) and Pluoronic® F-127 (ThermoFisher P3000MP, PubChem  
504 CID24751). Enzyme activity was monitored by the appearance of methylumbelliferone  
505 over time (Ex 360 nm, Em 449 nm). The assay was optimized to use 0.4 µM of  
506 enzyme, 0.1 mM of substrate, and 0.1% detergent in HBuffer for a 96-well plate format.  
507 The following compounds were used as inhibitors: ML348 (TOCRIS 5345, PubChem  
508 CID 3238952), ML349 (TOCRIS 5344, PubChem CID 16193817), and 2-  
509 bromopalmitate (Fisher Scientific AC218610500, PubChem CID 82145).

510

## 511 **Crystallization and structure determination**

512 Crystals of APT1 WT, S119A, and C2S bound or not to 2-Br-PLM were grown by sitting  
513 drop vapor diffusion at 18°C from a 1:1 mixture of protein solution (at ~10 mg/ml in H  
514 Buffer with 5 mM of DTT and 1 mM of EDTA) and reservoir solution. For the 2-Br-PLM  
515 complex crystals, the protein at 10 mg/ml was incubated with 2-Br-PLM at a final  
516 concentration of 5 mM for 10 min at room temperature before setting up the  
517 crystallization drops. The respective reservoir solutions contained: 10% w/v of  
518 polyethylene glycol (PEG) 8000, 10% w/v PEG 1000, 0.2 M potassium bromide, 0.1 M  
519 sodium acetate at pH 5.5 for WT; 25% of PEG 2000 MME (monomethyl ether), 0.3 M  
520 sodium acetate, 0.1 M sodium cacodylate pH 6.5 for C2S and S119A; and 0.1 M  
521 imidazole, 0.1 M MES (2-(N-morpholino)ethanesulfonic acid) monohydrate, 20% v/v  
522 PEG 500 MME, 10% w/v PEG 2000, 20 mM 1,6-hexanediol, 20 mM 1-butanol, 20 mM  
523 1,2-propanediol, 20 mM 2-propanol, 20 mM 1,4-butanediol, 20 mM 1,3-propanediol,  
524 pH 6.5, for C2S bound to 2-Br-PLM. Crystal growth occurred over a period of 5 to 15  
525 days.

526 Crystals were flash frozen by immersion in liquid nitrogen after soaking in  
527 cryoprotectant solution (reservoir solution supplemented with 25% w/v glycerol). X-ray  
528 diffraction data were collected on beamline X06DA at the Swiss Light Source (SLS,  
529 PSI, Villigen Switzerland) at -173.15°C (100 K). The X-ray wavelengths used were  
530 0.826 Å for WT, 1 Å for C2S and S119A, and 0.919 Å for C2S/2-Br-PLM. Data were  
531 indexed, integrated, and scaled with XDS (Kabsch, 2010). Phase determination was  
532 carried out by molecular replacement using Phaser (McCoy *et al*, 2007) of CCP4 Suite  
533 and the published structure of hAPT1 (PDB: 1FJ2) as a template. Coot (Emsley &  
534 Cowtan, 2004) was used for graphical map inspection and manual rebuilding of atomic

535 models. Phenix (Echols *et al*, 2012) was used for structure refinement. The WT  
536 crystals contained 6 molecules in the asymmetric unit (AU), while the C2S and S119  
537 mutants pack with 4 and 2 molecules in the AU, respectively. Apo-crystals contained  
538 residual palmitic acid molecules originating from *E. coli* in 50% of the molecules in the  
539 AU. However, there is full occupancy of the 2-Br-PLM in the C2S/2-Br-PLM complex  
540 crystals. The occupancy of 2-Br-PLM was confirmed by Br-anomalous difference  
541 maps, as the crystals were radiated with X-rays of the Br-peak energy. Residues  
542 T8/P9 to I229/D230 were modelled in all chains except for chain B in the WT crystals,  
543 where residues from N5 could be also modeled. There are no Ramachandran outliers.  
544 Crystallographic statistics are listed in Supplementary Table 1. Coordinates and  
545 structure factors were deposited in the Protein Data Bank (PDB accession codes:  
546 6QGS for wt/hAPT1; 6QGG for C2S/hAPT1; 6QGO for S119A/hAPT1; and 6QGN for  
547 the C2S-2Br-PLM complex crystals).

548

#### 549 **Atomistic molecular dynamics simulations**

550 The initial APT1 conformation of the full-length WT APT1 was taken from our  
551 crystallographic structures. The resulting model was fully solvated with TIP3P water  
552 models (Jorgensen *et al*, 1983) in a water box of dimension 70×70×70 Å<sup>3</sup> and  
553 neutralized by the addition of NaCl at a concentration of 150 mM. The CHARMM36  
554 force field was used for the parametrization of the protein (with CMAP correction). MD  
555 simulations were performed with NAMD 2.9 software (Klauda *et al*, 2010). The system  
556 was minimized for 1000 steps and equilibrated in the NPT ensemble for 5 ns at 1 atm  
557 and 300 K using a time-step of 2 fs. The pCys2/APT1 system was then simulated for  
558 0.3 μs in the NPT ensemble. Snapshots were taken at 0.1 ns time intervals for  
559 structural analysis. The system was equilibrated following the protocol reported by

560 Bovigny et al. (Bovigny *et al*, 2015) and was simulated for 0.3  $\mu$ s in the NPT ensemble.

561 In both simulated systems, the periodic electrostatic interactions were computed using

562 particle Mesh Ewald (PME) summation with grid spacing smaller than 1 Å.

563

### 564 **Coarse-grained molecular dynamics simulations**

565 The atomistic structure pCys2/APT1 and APT1 were coarse grained from our X-ray

566 structures using the Martini script (Bulacu *et al*, 2013) and were initially positioned 60

567 Å from the membrane using the Insane script (Wassenaar *et al*, 2015), which

568 generates the POPC phosphatidylcholine bilayer and solvent. The pCys parameters

569 were retrieved from a previous CG study (de Jong *et al*, 2013). Five independent

570 replicas, where the protein was aligned with different initial conditions with respect to

571 the membrane, were set up and the resulting systems were minimized and equilibrated

572 for 10 ps in NVT using a timestep of 2 fs. Afterwards, 100 ps of NPT MD with a time

573 step of 20 fs was applied for increasing the temperature and pressure to the range of

574 300 K and 1 bar, respectively. The temperature was controlled using the Bussi

575 thermostat with a coupling time of 1 ps (Bussi *et al*, 2007), while the pressure was

576 controlled by a weak semi-isotropic coupling with a reference pressure of 1 bar and a

577 compressibility of  $3 \times 10^{-4} \text{ bar}^{-1}$ . Production MD trajectories were collected for 4  $\mu$ s

578 using a time step of 20 fs. All simulations were performed using GROMACS 5.1.2.

579

### 580 **Analysis of fatty-acid binding**

581 Bound ligands were extracted from WT APT1 by the addition of 500  $\mu$ l of ice-cold

582 HPLC grade ethanol to 100  $\mu$ l of protein (at 414  $\mu$ M). The solution was incubated

583 at -20°C for 3 days and was subsequently centrifuged (16,000  $\times g$  at 4°C) and

584 evaporated under vacuum. The residual material was resuspended in 200  $\mu$ l of

585 propanol. Chromatographic separations employed an Agilent Zorbax Extended C18  
586 (2.1 mm x 50 mm, 1.8  $\mu$ m particle size) reversed-phase column run at a flow rate of  
587 0.4 ml/min. A linear gradient was applied with initial and final mobile phase consisting  
588 of 50% water:50% acetonitrile and 100% acetonitrile, respectively. The presence of  
589 fatty acid was determined by quadrupole-time-of-flight mass spectrometry (Q-TOF-  
590 MS) analyses and comparison with a stock solution (Sigma-Aldrich) composed of four  
591 different fatty-acid standards (lauric acid [12:0], myristic acid [14:0], palmitic acid  
592 [16:0], and stearic acid [18:0]).

593

594

#### 595 **Size-exclusion chromatography with multi-angle laser light scattering**

596 The mass measurements were performed on a Dionex UltiMate3000 HPLC system  
597 coupled with a 3-angle miniDAWN TREOS static light scattering detector (Wyatt  
598 Technology). Sample volumes of 100  $\mu$ l of APT1 WT and ATP2 WT at 40  $\mu$ M were  
599 injected into a Superdex 75 10/300 GL column (GE Healthcare) previously equilibrated  
600 with 50 mM Tris-HCl pH 8.0, 150 mM NaCl, and 2 mM TCEP at a flow rate of 0.5  
601 ml/min. The data were further analyzed using ASTRA 6.1 software using the  
602 absorbance at 280 nm and the theoretical extinction coefficient for concentration  
603 measurements.

604

#### 605 **Liposome floatation assays**

606 Liposomes composed of L-alpha-phosphatidylcholine (Avanti polar lipids 131 601C),  
607 L-alpha-phosphatidylserine (Avanti polar lipids 840032C), and L-alpha-  
608 phosphatidylethanolamine (Avanti polar lipids 840026C) were prepared in a 2:2:1  
609 molar ratio. Next, 2  $\mu$ M of phospholipid mix was suspended in 2 ml of HBS pH 7.4.



610 Then, 50 µg of purified protein were incubated with 200 µl of liposomes or with 200 µl  
611 of HBS pH 7.4 (control) for 2 h at 10°C. The protein-lipid suspension was adjusted to  
612 40% sucrose and loaded on the bottom of a sucrose step gradient (40%/30%/10%  
613 sucrose). After 1 h of centrifugation at 100 000 × *g*, the interfaces were collected from  
614 the top (1: between 10 and 30%; 2: between 30 and 40%; and 3: bottom), and 10 µl  
615 of each interface were analyzed by SDS-PAGE and Coomassie blue.

616

### 617 **<sup>3</sup>H-palmitic acid radiolabeling experiments**

618 HeLa cells were transfected or not with different constructs, incubated for 3 h in  
619 Glasgow minimal essential medium (IM; buffered with 10 mM HEPES, pH 7.4) with  
620 200 µCi/ml of <sup>3</sup>H palmitic acid (9,10-<sup>3</sup>H[N]) (American Radiolabeled Chemicals, Inc.).  
621 The cells were washed, and incubated in DMEM complete medium for the indicated  
622 time of chase or directly lysed for immunoprecipitation with the indicated antibodies.  
623 For immunoprecipitation, cells were washed three times PBS, lysed 30 min at 4°C in  
624 the buffer (0.5% Nonidet P-40, 500 mM Tris pH 7.4, 20 mM EDTA, 10 mM NaF, 2 mM  
625 benzamidin and protease inhibitor cocktail [Roche]), and centrifuged 3 min at 5000  
626 rpm. Supernatants were subjected to preclearing with G Sepharose beads prior to the  
627 immunoprecipitation reaction. Supernatants were incubated overnight with the  
628 appropriate antibodies and G Sepharose beads. After immunoprecipitation, washed  
629 beads were incubated for 5 min at 90°C in reducing sample buffer prior to 4–20%  
630 gradient SDS-PAGE. Gels were incubated 30 min in a fixative solution (25%  
631 isopropanol, 65% H<sub>2</sub>O, 10% acetic acid), followed by a 30 min incubation with the  
632 signal enhancer Amplify NAMP100 (GE Healthcare). The radiolabeled products were  
633 imaged using a Typhoon phosphoimager and quantified using a Typhoon Imager

634 (ImageQuantTool, GE Healthcare). The images shown for <sup>3</sup>H-palmitate labeling were  
635 obtained using fluorography on film.

636

### 637 **<sup>35</sup>S-cystein-methionin radiolabeling experiments**

638 HeLa cells were transfected with different Myc-APT2 constructs for 24 h, the cells were  
639 starved in DMEM HG devoid of Cys/Met for 30 min at 37°C, pulsed with the same  
640 medium supplemented with 140 µCi of <sup>35</sup>S Cys/Met (American Radiolabeled  
641 Chemicals, Inc.) for 20 min, washed, and incubated in DMEM complete medium for  
642 the indicated time of chase before immunoprecipitation as for <sup>3</sup>H-palmitic acid  
643 radiolabeling experiments.

644

### 645 **Membrane-cytosol separation**

646 To prepare the post-nuclear supernatant (PNS), HeLa cells were harvested, washed  
647 with PBS, and homogenized by passage through a 22 G injection needle in HB (2.9  
648 mM imidazole and 250 mM sucrose, pH 7.4) containing a mini tablet protease inhibitor  
649 mixture (Roche). After centrifugation, the supernatant was collected as HeLa PNS.  
650 PNS was centrifuged for 1 h at 100,000 × g in a safe-locked Eppendorf tube in a  
651 Sorvall MX150 ultracentrifuge. The pellet and supernatant were dissolved in an equal  
652 volume of reducing sample buffer and incubated for 5 min at 90°C prior to separation  
653 on a 4–20% gradient SDS-PAGE gel.

654

### 655 **Acyl-RAC capture assay**

656 Protein S-palmitoylation was assessed by the Acyl-RAC assay as previously described (Werno  
657 & Chamberlain, 2015) with some modifications. HeLa PNS were lysed in buffer (0.5%  
658 Triton-X100, 25 mM HEPES, 25 mM NaCl, 1 mM EDTA, pH 7.4, and protease inhibitor

659 cocktail). Then, 200  $\mu$ l of blocking buffer (100 mM HEPES, 1 mM EDTA, 87.5 mM  
660 SDS, and 1.5% [v/v] methyl methanethiosulfonate [MMTS]) was added to the cell  
661 lysate and incubated for 4 h at 40°C to block free the SH groups with MMTS. Proteins  
662 were acetone precipitated and resuspended in buffer (100 mM HEPES, 1 mM EDTA,  
663 35 mM SDS). For treatment with hydroxylamine (HA) and capture by Thiopropyl  
664 Sepharose® beads, 2 M of hydroxylamine was added together with the beads  
665 (previously activated for 15 min with water) to a final concentration of 0.5 M of  
666 hydroxylamine and 10% (w/v) beads. As a negative control, 2 M Tris was used instead  
667 of hydroxylamine. These samples were then incubated overnight at room temperature  
668 on a rotating wheel. After washes, the proteins were eluted from the beads by  
669 incubation in 40  $\mu$ l SDS sample buffer with  $\beta$  mercaptoethanol for 5 min at 95°C.  
670 Finally, samples were separated by SDS-PAGE and analyzed by immunoblotting. A  
671 fraction of the PNS was saved as the input.

672

### 673 **Immunofluorescence microscopy**

674 Cells were fixed in 4% paraformaldehyde (15 min), quenched with 50 mM NH<sub>4</sub>Cl (30  
675 min) and permeabilized with 0.1% Triton X-100 (5 min). Antibodies were diluted in  
676 PBS containing 1% BSA. Coverslips were incubated for 1 h with primary antibodies,  
677 washed three times in PBS, and incubated 45 min with secondary antibodies.  
678 Coverslips were mounted onto microscope slides with ProLong™ Gold Antifade  
679 Mountant (P36930; Invitrogen). Images were collected using a confocal laser-  
680 scanning microscope (Zeiss LSM 700) and processed using Fiji™ software.

681

682

683

## 684 **Acknowledgments**

685 We thank Davide Demurtas and Graham Knott from the BioEM EPFL Core Facility for  
686 the EM analysis, Stefania Vossio and Dr. Dimitri Moreau from the ACCESS Geneva  
687 screening platform; Laure Menin from EPFL ISIC proteomic facility and the beamline  
688 scientists of X06DA at SLS (Villigen Switzerland). We thank all the members of the  
689 F.G.v.d.G. lab for their discussions and suggestions. This work was supported by the  
690 Swiss National Science Foundation, the Swiss National Centre of Competence in  
691 Research (NCCR) Chemical Biology, and the European Research Council under the  
692 European Union's Seventh Framework Programme (FP/2007-2013) / ERC Grant  
693 Agreement n. 340260 - PalmERa'.

694

## 695 **Author contributions**

696 Conceptualization, L.A., M. A., P.A.S, M.D.P., G.V.D.G.; Investigation, L.A., M.A.,  
697 S.H., M.J.M., M.U.A., P.A. S, G. F., F.P.; Funding Acquisition, M.D.P. % G.V.D.G.;  
698 Writing–Original Draft M.A., L.A., S. H., M.J.M., M.D.P., G.V.D.G.; Writing–Review &  
699 Editing, L.A., M.A., S.H., M.J.M., M.U.A., P.A. S, G. F., F.P., M.D.P., G.V.D.G.;

700

## 701 **Resources**, S.H., L.A.

702 **Declaration of Interests**

703 The authors declare no competing interests.

704

## 705 **References**

706 Abrami L, Dallavilla T, Sandoz PA, Demir M, Kunz B, Savoglidis G, Hatzimanikatis V  
707 & van der Goot FG (2017) Identification and dynamics of the human  
708 ZDHHC16-ZDHHC6 palmitoylation cascade. *eLife* **6**: Available at:  
709 <http://www.ncbi.nlm.nih.gov/pubmed/28826475>

- 710 Blanc M, David FPA & van der Goot FG (2019) SwissPalm 2: Protein S-  
711 Palmitoylation Database. *Methods Mol. Biol.* **2009**: 203–214
- 712 Bovigny C, Tamò G, Lemmin T, Maïno N & Dal Peraro M (2015) LipidBuilder: A  
713 Framework To Build Realistic Models for Biological Membranes. *J Chem Inf*  
714 *Model* **55**: 2491–2499
- 715 Brown RWB, Sharma AI & Engman DM (2017) Dynamic protein S-palmitoylation  
716 mediates parasite life cycle progression and diverse mechanisms of virulence.  
717 *Crit. Rev. Biochem. Mol. Biol.* **52**: 145–162
- 718 Bulacu M, Goga N, Zhao W, Rossi G, Monticelli L, Periole X, Tieleman DP & Marrink  
719 SJ (2013) Improved Angle Potentials for Coarse-Grained Molecular Dynamics  
720 Simulations. *J Chem Theory Comput* **9**: 3282–3292
- 721 Bussi G, Donadio D & Parrinello M (2007) Canonical sampling through velocity  
722 rescaling. *J Chem Phys* **126**: 014101
- 723 Chen S, Han C, Miao X, Li X, Yin C, Zou J, Liu M, Li S, Stawski L, Zhu B, Shi Q, Xu  
724 Z-X, Li C, Goding CR, Zhou J & Cui R (2019) Targeting MC1R  
725 depalmitoylation to prevent melanomagenesis in redheads. *Nat Commun* **10**:  
726 877
- 727 Conibear E & Davis NG (2010) Palmitoylation and depalmitoylation dynamics at a  
728 glance. *Journal of cell science* **123**: 4007–10
- 729 Devedjiev Y, Dauter Z, Kuznetsov SR, Jones TL & Derewenda ZS (2000) Crystal  
730 structure of the human acyl protein thioesterase I from a single X-ray data set  
731 to 1.5 Å. *Structure* **8**: 1137–46
- 732 Duarte JM, Srebniak A, Schärer MA & Capitani G (2012) Protein interface  
733 classification by evolutionary analysis. *BMC Bioinformatics* **13**: 334
- 734 Echols N, Grosse-Kunstleve RW, Afonine PV, Bunkóczi G, Chen VB, Headd JJ,  
735 McCoy AJ, Moriarty NW, Read RJ, Richardson DC, Richardson JS,  
736 Terwilliger TC & Adams PD (2012) Graphical tools for macromolecular  
737 crystallography in PHENIX. *J Appl Crystallogr* **45**: 581–586
- 738 Emsley P & Cowtan K (2004) Coot: model-building tools for molecular graphics. *Acta*  
739 *Crystallogr D Biol Crystallogr* **60**: 2126–32
- 740 Fukata Y, Murakami T, Yokoi N & Fukata M (2016) Local Palmitoylation Cycles and  
741 Specialized Membrane Domain Organization. *Current topics in membranes*  
742 **77**: 97–141
- 743 Gadalla MR & Veit M (2020) Toward the identification of ZDHHC enzymes required  
744 for palmitoylation of viral protein as potential drug targets. *Expert Opinion on*  
745 *Drug Discovery* **15**: 159–177
- 746 de Jong DH, Lopez CA & Marrink SJ (2013) Molecular view on protein sorting into  
747 liquid-ordered membrane domains mediated by gangliosides and lipid  
748 anchors. *Faraday Discuss.* **161**: 347–363; discussion 419-459

- 749 Jorgensen WL, Chandrasekhar J, Madura JD, Impey RW & Klein ML (1983)  
750 Comparison of simple potential functions for simulating liquid water. *The*  
751 *Journal of Chemical Physics* **79**: 926
- 752 Kabsch W (2010) XDS. *Acta Crystallogr. D Biol. Crystallogr.* **66**: 125–132
- 753 Kathayat RS, Cao Y, Elvira PD, Sandoz PA, Zaballa M-E, Springer MZ, Drake LE,  
754 Macleod KF, van der Goot FG & Dickinson BC (2018) Active and dynamic  
755 mitochondrial S-depalmitoylation revealed by targeted fluorescent probes. *Nat*  
756 *Commun* **9**: 334
- 757 Kemp LE, Rusch M, Adibekian A, Bullen HE, Graindorge A, Freymond C, Rottmann  
758 M, Braun-Breton C, Baumeister S, Porfetye AT, Vetter IR, Hedberg C &  
759 Soldati-Favre D (2013) Characterization of a serine hydrolase targeted by  
760 acyl-protein thioesterase inhibitors in *Toxoplasma gondii*. *The Journal of*  
761 *biological chemistry* **288**: 27002–18
- 762 Khoury GA, Baliban RC & Floudas CA (2011) Proteome-wide post-translational  
763 modification statistics: frequency analysis and curation of the swiss-prot  
764 database. *Sci Rep* **1**:
- 765 Kong E, Peng S, Chandra G, Sarkar C, Zhang Z, Bagh MB & Mukherjee AB (2013)  
766 Dynamic palmitoylation links cytosol-membrane shuttling of acyl-protein  
767 thioesterase-1 and acyl-protein thioesterase-2 with that of proto-oncogene H-  
768 ras product and growth-associated protein-43. *The Journal of biological*  
769 *chemistry* **288**: 9112–25
- 770 Lakkaraju AK, Abrami L, Lemmin T, Blaskovic S, Kunz B, Kihara A, Dal Peraro M &  
771 van der Goot FG (2012) Palmitoylated calnexin is a key component of the  
772 ribosome-translocon complex. *Embo J* **31**: 1823–1835
- 773 Lemonidis K, Werno MW, Greaves J, Diez-Ardanuy C, Sanchez-Perez MC, Salaun  
774 C, Thomson DM & Chamberlain LH (2015) The zDHHC family of S-  
775 acyltransferases. *Biochemical Society transactions* **43**: 217–21
- 776 Lin DT & Conibear E (2015) Enzymatic protein depalmitoylation by acyl protein  
777 thioesterases. *Biochemical Society transactions* **43**: 193–8
- 778 Mueller M, Grauschopf U, Maier T, Glockshuber R & Ban N (2009) The structure of a  
779 cytolytic alpha-helical toxin pore reveals its assembly mechanism. *Nature*  
780 **459**: 726–30
- 781 Ngaki MN, Louie GV, Philippe RN, Manning G, Pojer F, Bowman ME, Li L, Larsen E,  
782 Wurtele ES & Noel JP (2012) Evolution of the chalcone-isomerase fold from  
783 fatty-acid binding to stereospecific catalysis. *Nature* **485**: 530–533
- 784 Rana MS, Kumar P, Lee C-J, Verardi R, Rajashankar KR & Banerjee A (2018) Fatty  
785 acyl recognition and transfer by an integral membrane S -acyltransferase.  
786 *Science* **359**: eaao6326
- 787 Salaun C, Greaves J & Chamberlain LH (2010) The intracellular dynamic of protein  
788 palmitoylation. *J Cell Biol* **191**: 1229–38

- 789 Shahinian S & Silviu JR (1995) Doubly-lipid-modified protein sequence motifs  
790 exhibit long-lived anchorage to lipid bilayer membranes. *Biochemistry* **34**:  
791 3813–3822
- 792 Vartak N, Papke B, Grecco HE, Rossmannek L, Waldmann H, Hedberg C &  
793 Bastiaens PI (2014) The Autodepalmitoylating Activity of APT Maintains the  
794 Spatial Organization of Palmitoylated Membrane Proteins. *Biophysical journal*  
795 **106**: 93–105
- 796 Wassenaar TA, Ingólfsson HI, Böckmann RA, Tieleman DP & Marrink SJ (2015)  
797 Computational Lipidomics with insane: A Versatile Tool for Generating  
798 Custom Membranes for Molecular Simulations. *J Chem Theory Comput* **11**:  
799 2144–2155
- 800 Wepy JA, Galligan JJ, Kingsley PJ, Xu S, Goodman MC, Tallman KA, Rouzer CA &  
801 Marnett LJ (2019) Lysophospholipases cooperate to mediate lipid  
802 homeostasis and lysophospholipid signaling. *J. Lipid Res.* **60**: 360–374
- 803 Werno MW & Chamberlain LH (2015) S-acylation of the Insulin-Responsive  
804 Aminopeptidase (IRAP): Quantitative analysis and Identification of Modified  
805 Cysteines. *Scientific reports* **5**: 12413
- 806 Won SJ, Cheung See Kit M & Martin BR (2018) Protein depalmitoylases. *Critical*  
807 *reviews in biochemistry and molecular biology* **53**: 83–98
- 808 Won SJ, Davda D, Labby KJ, Hwang SY, Pricer R, Majmudar JD, Armacost KA,  
809 Rodriguez LA, Rodriguez CL, Chong FS, Torossian KA, Palakurthi J, Hur ES,  
810 Meagher JL, Brooks CL 3rd, Stuckey JA & Martin BR (2016) Molecular  
811 Mechanism for Isoform-Selective Inhibition of Acyl Protein Thioesterases 1  
812 and 2 (APT1 and APT2). *ACS chemical biology* **11**: 3374–3382
- 813 Zaballa M-E & van der Goot FG (2018) The molecular era of protein S-acylation:  
814 spotlight on structure, mechanisms, and dynamics. *Crit. Rev. Biochem. Mol.*  
815 *Biol.* **53**: 420–451
- 816 Zingler P, Särchen V, Glatter T, Caning L, Saggau C, Kathayat RS, Dickinson BC,  
817 Adam D, Schneider-Brachert W, Schütze S & Fritsch J (2019) Palmitoylation  
818 is required for TNF-R1 signaling. *Cell Commun Signal* **17**: Available at:  
819 <https://www.ncbi.nlm.nih.gov/pmc/articles/PMC6683503/> [Accessed August  
820 20, 2019]
- 821
